# Supplementary material
Source: MDPI journal article supplement (https://www.mdpi.com/2073-4344/5/4/2244)
Supplement: s1 [file s1]

## Supplementary Information

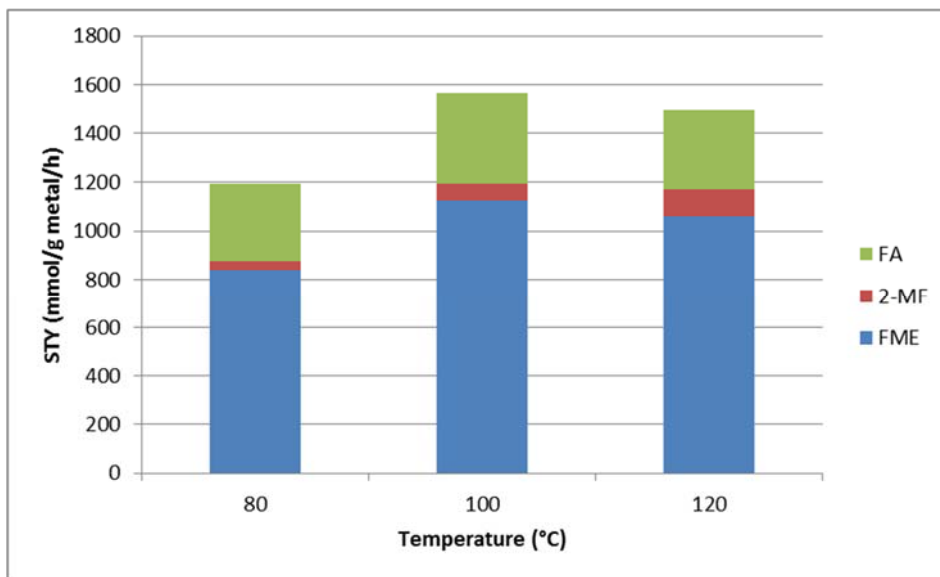

**Figure S1.** Space time yield (mmol/g metal/h) to 2-methoxymethylfuran (FME), furfuryl alcohol (FA) and 2-methylfuran (2-MF) in the reductive etherification of furfural with 5% w/w Pd on charcoal catalyst (Johnson Matthey, 5R87L). Reaction time: 1 h. Hydrogen pressure: 50 bar. Catalyst loading: 10–20 mg. Furfural concentration: 10% w/w in methanol.

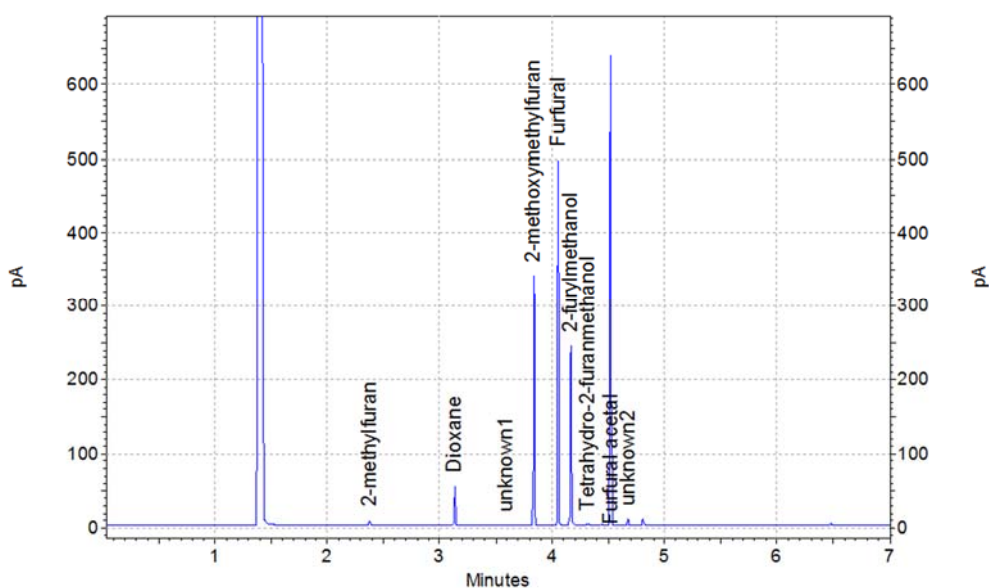

**Figure S2.** Chromatogram of the final mixture in the reductive etherification of furfural with the reduced form of 5% w/w Pd on graphite as catalyst (Johnson Matthey, JCAT010).
